# Supplementary material
Source: PubMed Central journal article supplement (PMC3931174)
Supplement: hdy2013112x1.pdf [file hdy2013112x1.pdf]

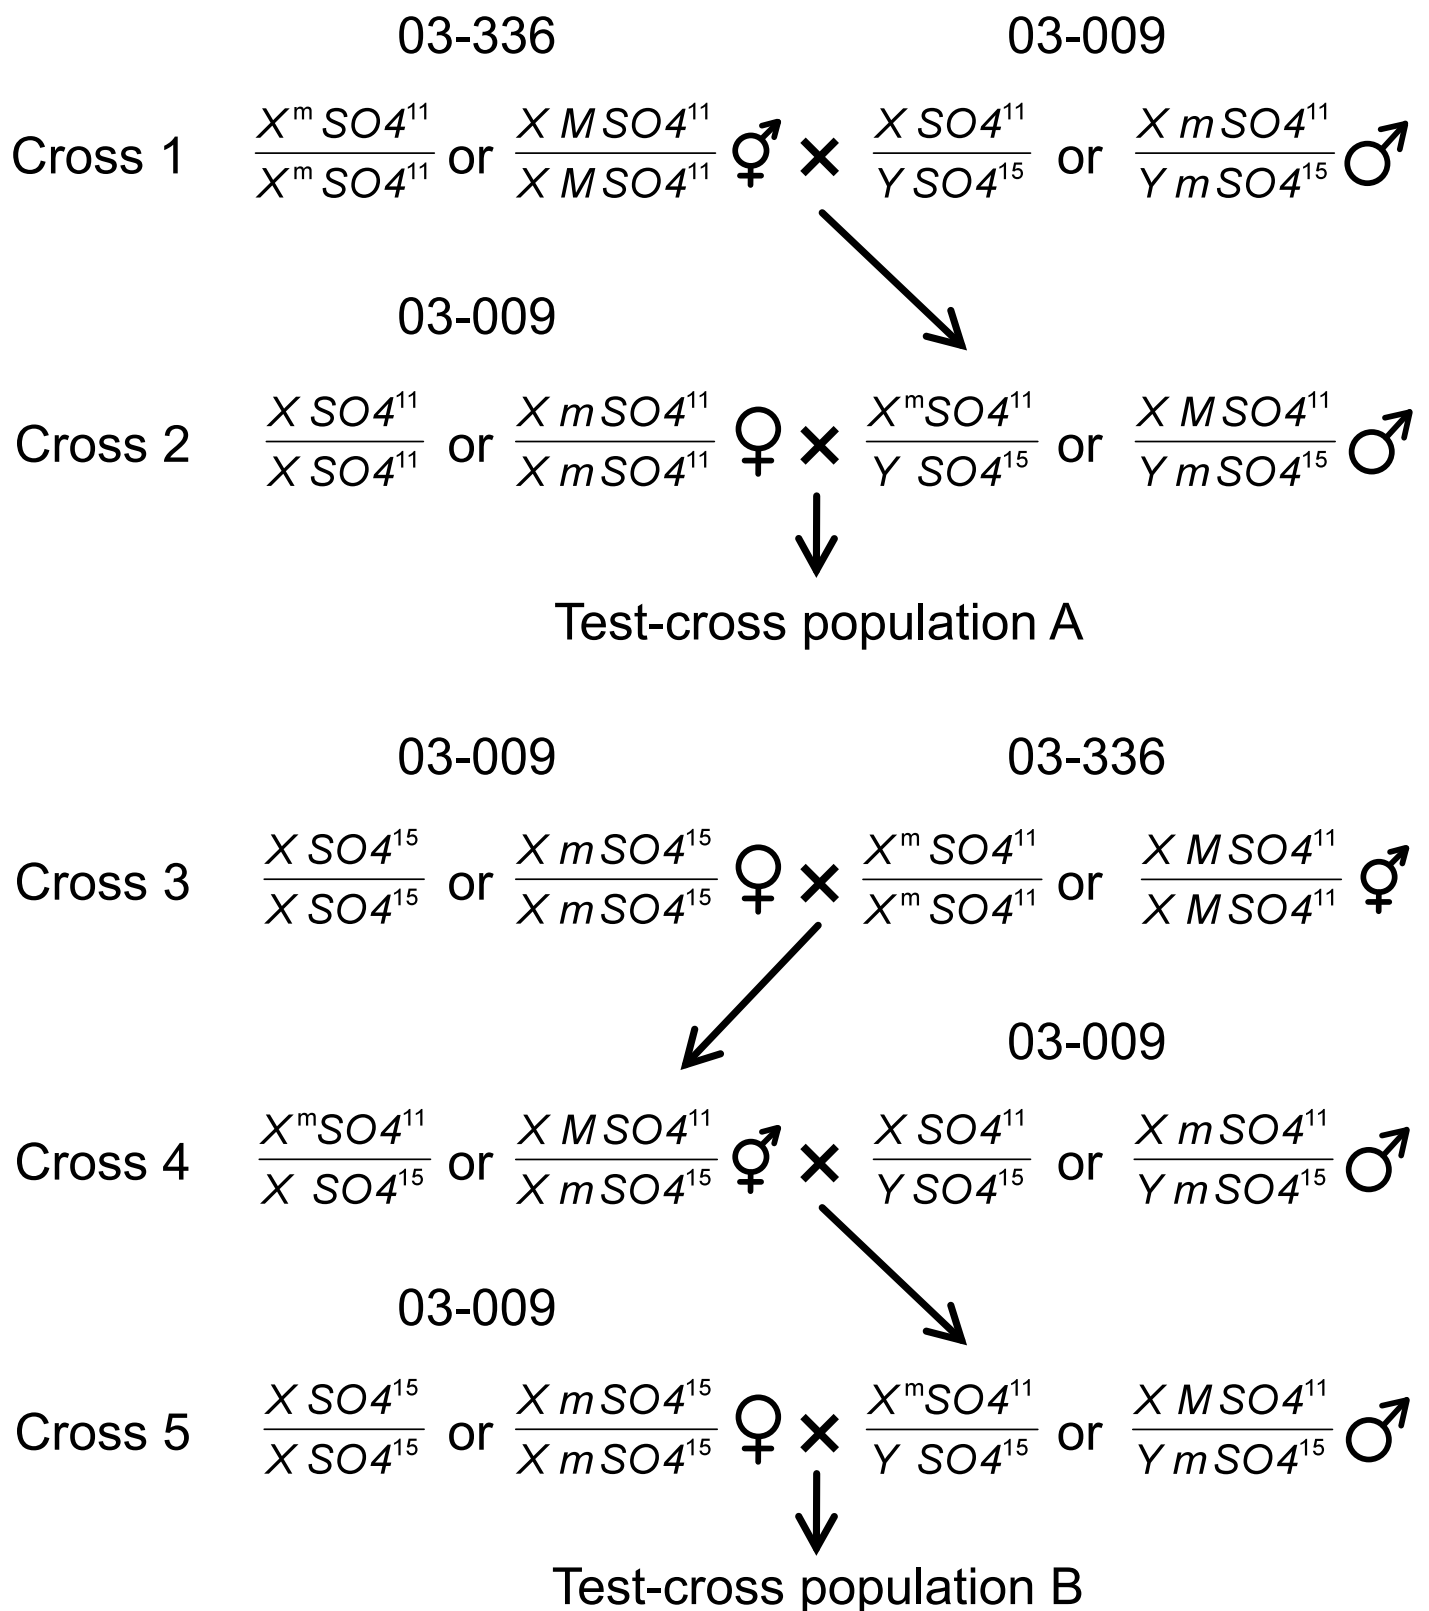

**Supplementary Figure 1** Crossing scheme for allelism tests between  $X/Y$  and the monoecious gene. The symbol “ $X^m$ ” or “ $M$ ” was used to refer to the monoecious gene, depending on the assumption of the presence or absence of its allelism to  $X/Y$ . Genotypes at a sex-linked SSR locus ( $SO4$ ) are also indicated.
