# Supplementary material
Source: PubMed Central journal article supplement (PMC3931174)
Supplement: hdy2013112x2.pdf [file hdy2013112x2.pdf]

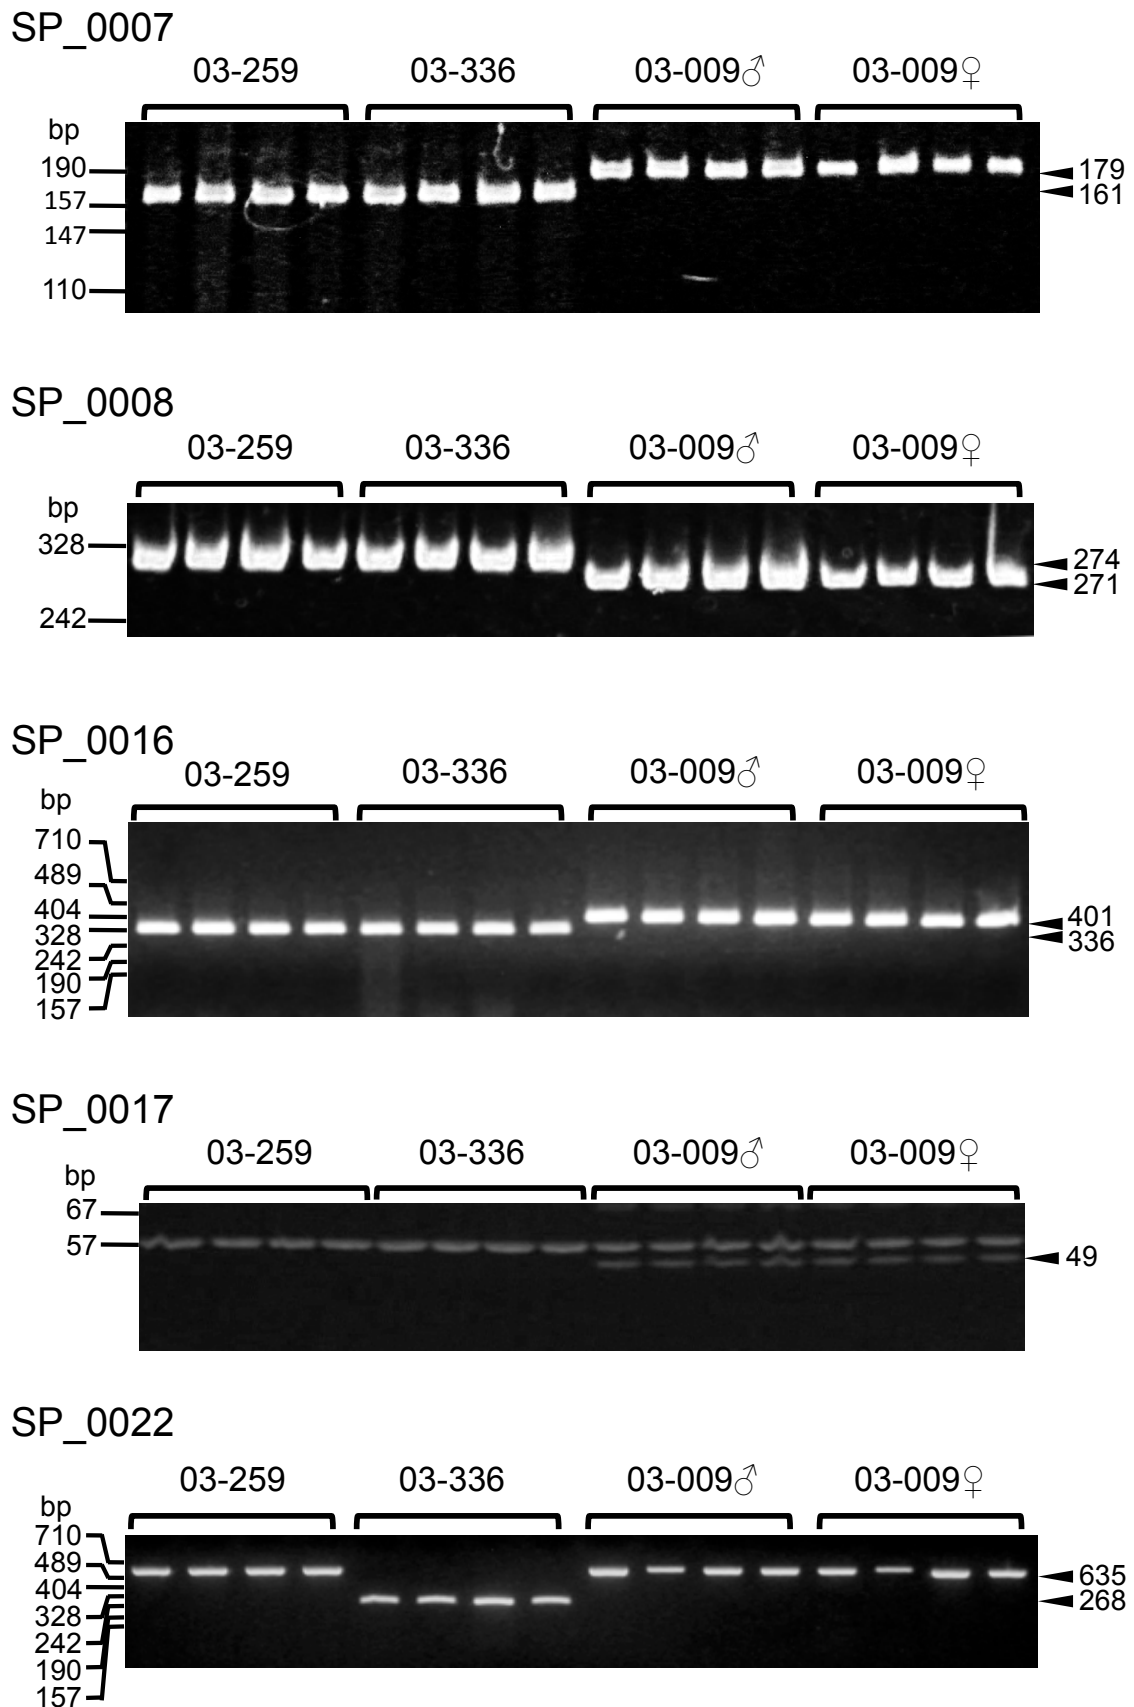

**Supplementary Figure 2** Sex-linked SCAR markers developed in this study. The SCAR markers gave variants between the parental lines (03-259, 03-336, and 03-009) of the mapping populations used in this study. Sizes (bp) of variant fragments are indicated on the right.
