# Supplementary material
Source: PubMed Central journal article supplement (PMC3931174)
Supplement: hdy2013112x3.pdf [file hdy2013112x3.pdf]

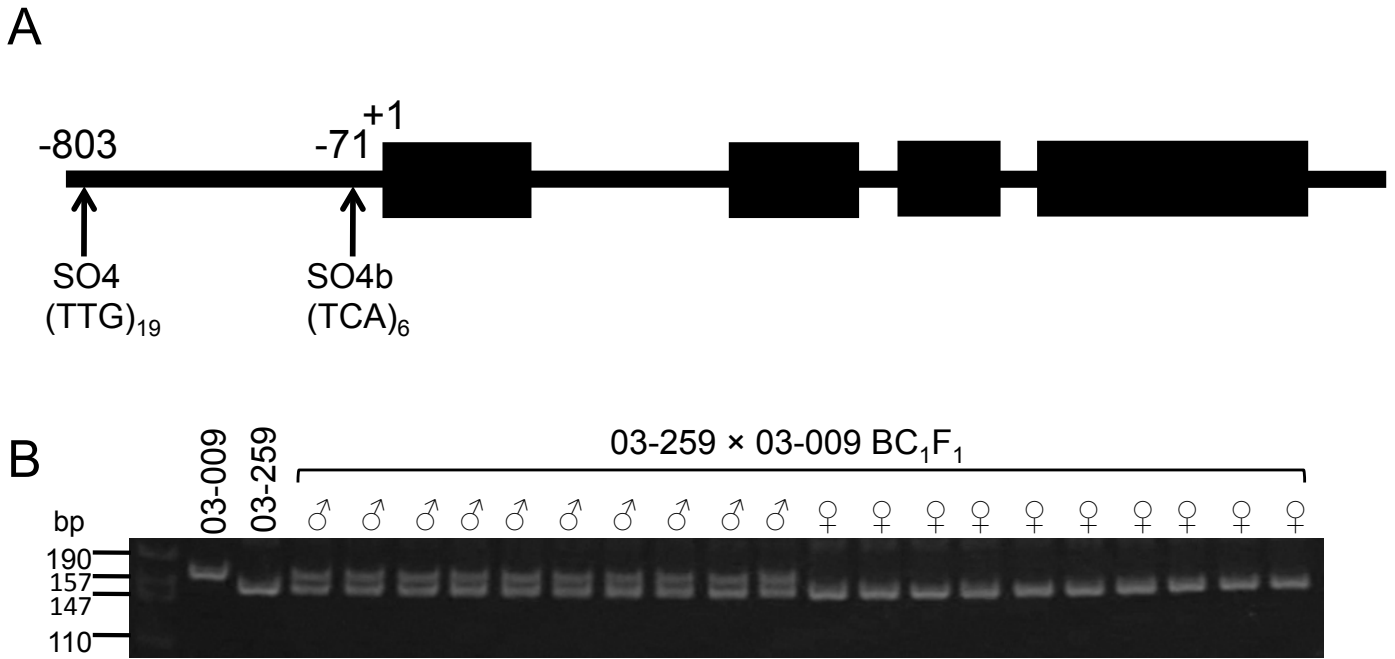

**Supplementary Figure 3** A novel SSR marker, SO4b, for a variant in the upstream region of the *Nir* gene. **A)** Structures of the *Nir* gene (Back et al. 1991) showing the positions of the two SSRs, SO4 and SO4b. **B)** PCR-based genotyping of SO4b locus for 03-009, 03-259, and their backcross progenies.
