# Supplementary material
Source: PubMed Central journal article supplement (PMC3931174)
Supplement: hdy2013112x4.pdf [file hdy2013112x4.pdf]

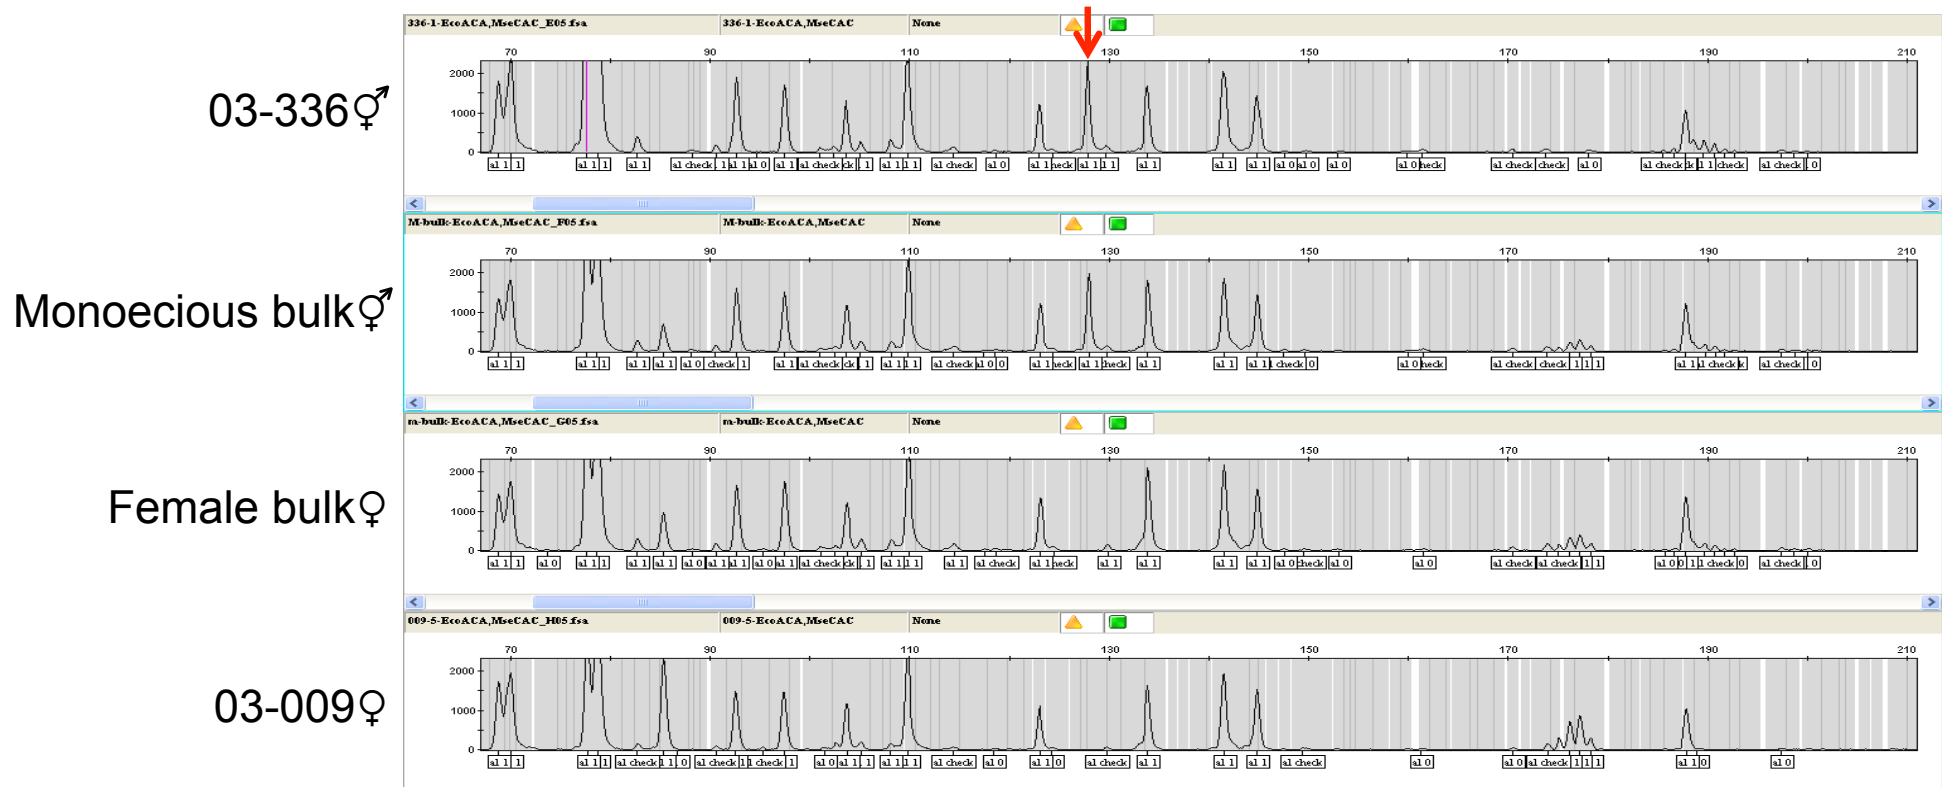

**Supplementary Figure 4** Parts of chromatograms obtained from AFLP analysis of bulked monoecious and female plants from the  $F_2$  families of 03-009×03-336 using the primer set *EcoRI*-06 and *MseI*-18. AFLP peaks indicated by a red arrow are present in the 03-336 and monoecious bulk but not in the 03-009 female plant or female bulk.
