# Supplementary material
Source: PubMed Central journal article supplement (PMC3931174)
Supplement: hdy2013112x5.pdf [file hdy2013112x5.pdf]

Test cross population B

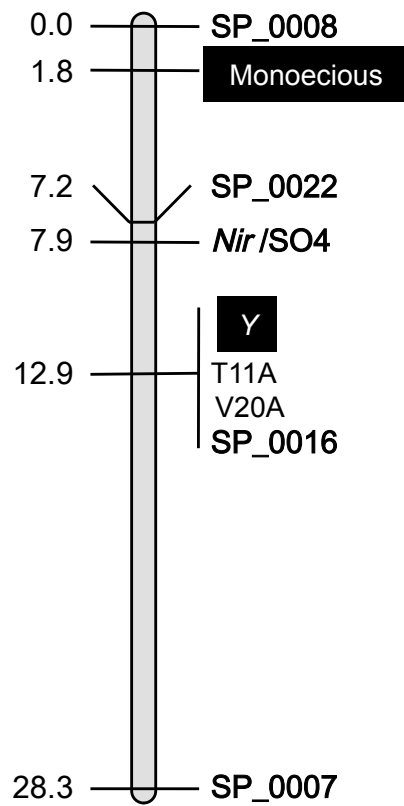

**Supplementary Figure 5** Genetic linkage map of the chromosomal region covering the sex-determining genes. The linkage map was constructed from Test-cross population B. Markers positions (cM) and names are written on the left and right side of the map, respectively.
